# Supplementary material for: Efficacy and safety of CD19 CAR T constructed with a new anti-CD19 chimeric antigen receptor in relapsed or refractory acute lymphoblastic leukemia
Source: Springer Nature journal article supplement (doi:10.1186/s13045-020-00953-8), 2020-09-07
Supplement: MOESM1 [file 18355210]

**Supplementary Table 1. Antibodies used for flow cytometry staining of single cell suspensions**

| Antigen                                               | Antibody clone | Supplier                     | Catalog number | Fluorophore     |
|-------------------------------------------------------|----------------|------------------------------|----------------|-----------------|
| CD19                                                  | FMC63          | Novus Biologicals            | NBP2-52716     | Unconjugated    |
| CD19                                                  | HI19 $\alpha$  | Biolegend                    | 302254         | PE              |
| CD8                                                   | B9.11          | Beckman Coulter              | IM0451U        | FITC            |
| CD4                                                   | SK3            | BD Biosciences               | 341654         | PerCP/Cy5.5     |
| CCR7                                                  | 150503         | BD Biosciences               | 560765         | PE              |
| CD3                                                   | UCHT1          | BD Biosciences               | 558117         | Pacific Blue    |
| CD45RA                                                | L48            | BD Biosciences               | 337167         | PE/Cy7          |
| CD25                                                  | B1.49.9        | Beckman Coulter              | A07774         | PE              |
| CD127                                                 | A019D5         | Biolegend                    | 351316         | APC             |
| Anti-mouse IgG (H+L),<br>F(ab') <sub>2</sub> Fragment |                | Cell Signaling<br>Technology | 4410s          | Alexa Fluor 647 |

**Supplementary Table 2. Computational alanine scanning on the complex of CD19 ECD and HI19 $\alpha$  scFv**

| Mutation     | Mutation Energy | Effect of Mutation |
|--------------|-----------------|--------------------|
| C:LEU112>ALA | 1.88            | DESTABILIZING      |
| C:GLY110>ALA | 1.69            | DESTABILIZING      |
| C:PRO134>ALA | 1.41            | DESTABILIZING      |
| C:GLU96>ALA  | 1.01            | DESTABILIZING      |
| C:GLN162>ALA | 0.95            | DESTABILIZING      |
| C:LEU164>ALA | 0.86            | DESTABILIZING      |
| C:GLY111>ALA | 0.74            | DESTABILIZING      |
| C:PRO172>ALA | 0.59            | DESTABILIZING      |

**Supplementary Table 3. Computational alanine scanning on the complex of CD19 ECD and FMC63 scFv**

| Mutation     | Mutation Energy | Effect of Mutation |
|--------------|-----------------|--------------------|
| C:TRP177>ALA | 3.29            | DESTABILIZING      |
| C:TRP61>ALA  | 2.37            | DESTABILIZING      |
| C:ARG56>ALA  | 2.09            | DESTABILIZING      |
| C:LEU58>ALA  | 1.63            | DESTABILIZING      |
| C:TRP91>ALA  | 1.39            | DESTABILIZING      |
| C:LEU164>ALA | 1.32            | DESTABILIZING      |
| C:ASP218>ALA | 1.23            | DESTABILIZING      |
| C:ARG230>ALA | 1.15            | DESTABILIZING      |
| C:TRP220>ALA | 0.94            | DESTABILIZING      |

|              |      |               |
|--------------|------|---------------|
| C:PHE63>ALA  | 0.84 | DESTABILIZING |
| C:LEU168>ALA | 0.84 | DESTABILIZING |
| C:ASP158>ALA | 0.8  | DESTABILIZING |
| C:PRO183>ALA | 0.71 | DESTABILIZING |
| C:TRP261>ALA | 0.67 | DESTABILIZING |
| C:HIS54>ALA  | 0.65 | DESTABILIZING |
| C:LEU160>ALA | 0.52 | DESTABILIZING |
| C:MET170>ALA | 0.52 | DESTABILIZING |

**Supplementary Table 4. Non-bond interaction between HI19 $\alpha$  and hCD19 ECD**

| Name                        | Distance | Category                        | Types                         |
|-----------------------------|----------|---------------------------------|-------------------------------|
| C:LYS130:HZ1-H:ASP197:OD2   | 2.99968  | Hydrogen Bond;<br>Electrostatic | Salt Bridge;Attractive Charge |
| C:LYS117:NZ-H:ASP197:OD2    | 4.74657  | Electrostatic                   | Attractive Charge             |
| C:LYS130:NZ - H:ASP195:OD2  | 4.75474  | Electrostatic                   | Attractive Charge             |
| C:GLN162:HE21 - H:TYR60:O   | 2.87565  | Hydrogen Bond                   | Conventional Hydrogen Bond    |
| C:GLN162:HE22 - H:SER61:O   | 2.06008  | Hydrogen Bond                   | Conventional Hydrogen Bond    |
| C:THR169:HG1 - H:TYR60:OH   | 1.86865  | Hydrogen Bond                   | Conventional Hydrogen Bond    |
| H:TYR64:HH - C:SER163:O     | 2.42486  | Hydrogen Bond                   | Conventional Hydrogen Bond    |
| H:TYR64:HH - C:ASP167:O     | 2.32071  | Hydrogen Bond                   | Conventional Hydrogen Bond    |
| H:SER67:HG - C:PRO172:O     | 2.00899  | Hydrogen Bond                   | Conventional Hydrogen Bond    |
| H:SER78:HG - C:ASN161:O     | 2.76553  | Hydrogen Bond                   | Conventional Hydrogen Bond    |
| H:TYR172:HH - C:GLY97:O     | 2.46944  | Hydrogen Bond                   | Conventional Hydrogen Bond    |
| H:ARG238:HH21 - C:GLU96:OE1 | 2.56241  | Hydrogen Bond                   | Conventional Hydrogen Bond    |
| H:ARG238:HH22 - C:GLU96:OE1 | 2.46999  | Hydrogen Bond                   | Conventional Hydrogen Bond    |
| H:SER242:HG - C:VAL95:O     | 2.8557   | Hydrogen Bond                   | Conventional Hydrogen Bond    |
| H:SER242:HG - C:GLU96:O     | 3.02546  | Hydrogen Bond                   | Conventional Hydrogen Bond    |
| H:TYR248:HH - C:GLU96:O     | 2.22702  | Hydrogen Bond                   | Conventional Hydrogen Bond    |
| H:TYR251:HH - C:GLU96:OE2   | 2.18266  | Hydrogen Bond                   | Conventional Hydrogen Bond    |
| C:LYS130:HE2 - H:ASP195:OD2 | 2.74364  | Hydrogen Bond                   | Carbon Hydrogen Bond          |
| C:PRO134:HD1 - H:ILE241:O   | 3.0158   | Hydrogen Bond                   | Carbon Hydrogen Bond          |
| C:LEU164:HA - H:TYR64:OH    | 2.12798  | Hydrogen Bond                   | Carbon Hydrogen Bond          |
| C:MET170:HA - H:ARG65:O     | 2.29093  | Hydrogen Bond                   | Carbon Hydrogen Bond          |
| H:THR42:HB - C:ASN161:O     | 2.84799  | Hydrogen Bond                   | Carbon Hydrogen Bond          |
| H:SER67:HB2 - C:ALA171:O    | 2.02977  | Hydrogen Bond                   | Carbon Hydrogen Bond          |
| H:GLY194:HA2 - C:GLY129:O   | 3.08142  | Hydrogen Bond                   | Carbon Hydrogen Bond          |
| H:THR240:HB - C:GLU96:O     | 3.01836  | Hydrogen Bond                   | Carbon Hydrogen Bond          |
| H:SER242:HB2 - C:GLU96:O    | 1.96151  | Hydrogen Bond                   | Carbon Hydrogen Bond          |
| C:THR169:HN - H:TYR64       | 2.94094  | Hydrogen Bond                   | Pi-Donor Hydrogen Bond        |
| C:PRO134 - H:ILE241         | 4.84992  | Hydrophobic                     | Alkyl                         |
| C:PRO134 - H:VAL244         | 4.05062  | Hydrophobic                     | Alkyl                         |
| H:VAL244 - C:LEU101         | 5.48013  | Hydrophobic                     | Alkyl                         |
| H:VAL244 - C:LEU116         | 3.88092  | Hydrophobic                     | Alkyl                         |

|                     |         |             |          |
|---------------------|---------|-------------|----------|
| H:VAL245 - C:LEU112 | 5.05273 | Hydrophobic | Alkyl    |
| H:TYR64 - C:LEU168  | 5.37667 | Hydrophobic | Pi-Alkyl |
| H:TYR192 - C:LYS130 | 5.49221 | Hydrophobic | Pi-Alkyl |

**Supplementary Table 5. Non-bond interaction between FMC63 and hCD19 ECD**

| Name                       | Distance | Category      | Types                      |
|----------------------------|----------|---------------|----------------------------|
| F:ARG53:NE - C:ASP218:OD2  | 4.97651  | Electrostatic | Attractive Charge          |
| C:ARG56:HH11 - F:GLY247:O  | 2.06903  | Hydrogen Bond | Conventional Hydrogen Bond |
| C:ARG56:HH12 - F:TYR246:O  | 2.05558  | Hydrogen Bond | Conventional Hydrogen Bond |
| C:ARG56:HH12 - F:GLY248:O  | 2.07919  | Hydrogen Bond | Conventional Hydrogen Bond |
| C:ARG56:HH22 - F:GLY248:O  | 2.54991  | Hydrogen Bond | Conventional Hydrogen Bond |
| C:THR169:HN - F:SER198:O   | 2.17681  | Hydrogen Bond | Conventional Hydrogen Bond |
| C:ARG230:HH12 - F:LEU54:O  | 2.05587  | Hydrogen Bond | Conventional Hydrogen Bond |
| F:TYR32:HH - C:PRO57:O     | 1.97098  | Hydrogen Bond | Conventional Hydrogen Bond |
| F:TYR204:HH - C:SER159:O   | 2.09663  | Hydrogen Bond | Conventional Hydrogen Bond |
| F:SER210:HG - C:ASP158:OD1 | 2.59296  | Hydrogen Bond | Conventional Hydrogen Bond |
| F:THR213:HG1 - C:ASP158:O  | 1.99273  | Hydrogen Bond | Conventional Hydrogen Bond |
| C:HIS54:HD2 - F:GLY247:O   | 1.96267  | Hydrogen Bond | Carbon Hydrogen Bond       |
| C:ARG56:HD2 - F:GLY247:O   | 3.00059  | Hydrogen Bond | Carbon Hydrogen Bond       |
| C:LEU164:HA - F:GLU199:O   | 2.0872   | Hydrogen Bond | Carbon Hydrogen Bond       |
| C:LEU168:HA - F:SER198:O   | 1.98845  | Hydrogen Bond | Carbon Hydrogen Bond       |
| F:SER198:HA - C:THR169:O   | 2.15073  | Hydrogen Bond | Carbon Hydrogen Bond       |
| F:THR201:HA - C:LEU164:O   | 2.24241  | Hydrogen Bond | Carbon Hydrogen Bond       |
| F:SER210:HA - C:ASP158:OD1 | 2.14936  | Hydrogen Bond | Carbon Hydrogen Bond       |
| F:THR213:HA - C:ASP158:O   | 2.71305  | Hydrogen Bond | Carbon Hydrogen Bond       |
| F:ILE215:HA - C:ASN161:OD1 | 2.47184  | Hydrogen Bond | Carbon Hydrogen Bond       |
| C:ARG56:NE - F:TYR251      | 4.30386  | Electrostatic | Pi-Cation                  |
| C:ARG56:HH21 - F:TYR251    | 2.16168  | Hydrogen Bond | Pi-Donor Hydrogen Bond     |
| C:TRP177 - F:TRP195        | 5.42153  | Hydrophobic   | Pi-Pi Stacked              |
| C:TRP177 - F:TRP195        | 4.34988  | Hydrophobic   | Pi-Pi Stacked              |
| C:TRP177 - F:TRP195        | 4.01551  | Hydrophobic   | Pi-Pi Stacked              |
| F:TRP195 - C:TRP177        | 4.5345   | Hydrophobic   | Pi-Pi Stacked              |
| C:PRO183 - F:LEU96         | 4.28572  | Hydrophobic   | Alkyl                      |
| C:PRO184 - F:LEU96         | 4.52884  | Hydrophobic   | Alkyl                      |
| F:TYR32 - C:PRO57          | 4.90288  | Hydrophobic   | Pi-Alkyl                   |
| F:HIS50 - C:PRO57          | 5.19082  | Hydrophobic   | Pi-Alkyl                   |
| F:TYR203 - C:VAL182        | 5.28128  | Hydrophobic   | Pi-Alkyl                   |
| F:TYR203 - C:PRO183        | 4.73926  | Hydrophobic   | Pi-Alkyl                   |

**Supplementary Table 6. Univariate analysis for relapse-free survival**

|                                              | B      | SE    | Wald  | HR    | P     | 95% CI      |
|----------------------------------------------|--------|-------|-------|-------|-------|-------------|
| CD8 <sup>+</sup> T <sub>N</sub> (Q2-4 /Q1) * | -1.940 | 0.781 | 6.169 | 0.144 | 0.013 | 0.031-0.664 |

|                                               |        |       |       |       |       |             |
|-----------------------------------------------|--------|-------|-------|-------|-------|-------------|
| CD4 <sup>+</sup> T <sub>N</sub> (Q2-4 /Q1) *  | -0.892 | 0.676 | 1.743 | 0.410 | 0.187 | 0.109-1.541 |
| Age (≥18/<18 years old)                       | 1.301  | 0.684 | 3.623 | 3.674 | 0.057 | 0.962-14.03 |
| High-risk gene mutation or deletion *(yes/no) | 0.141  | 0.628 | 0.050 | 1.151 | 0.823 | 0.336-3.938 |
| Glucocorticoid therapy (yes/no)               | -0.496 | 0.694 | 0.510 | 0.609 | 0.475 | 0.156-2.375 |
| Transplantation (yes/no)                      | -1.919 | 0.688 | 7.789 | 0.147 | 0.005 | 0.038-0.565 |

T<sub>N</sub>, naïve T cells; Q2-4 and Q1, CD8<sup>+</sup> T<sub>N</sub> cells percentage in 20 min after CD19 CAR T infusion were ranked and divided the into four quartiles, with the lowest CD8<sup>+</sup> T<sub>N</sub> cells frequency in quartile one (Q1) and the greatest in quartile four (Q4); High-risk gene mutation or deletion include T315I mutation, TP53 mutation, IKZF1 deletion

### Supplementary Table 7. Multivariate analysis for relapse-free survival

|                                              | <b>B</b> | <b>SE</b> | <b>Wald</b> | <b>HR</b> | <b>P</b> | <b>95% CI</b> |
|----------------------------------------------|----------|-----------|-------------|-----------|----------|---------------|
| CD8 <sup>+</sup> T <sub>N</sub> (Q2-4 /Q1) * | -2.279   | 0.903     | 6.373       | 0.102     | 0.012    | 0.017-0.601   |
| Transplantation (yes/no)                     | -1.213   | 0.928     | 1.710       | 0.297     | 0.191    | 0.048-1.832   |
| Age (≥18/<18 years old)                      | 0.814    | 0.876     | 0.864       | 2.257     | 0.353    | 0.406-12.56   |

T<sub>N</sub>, naïve T cells; Q2-4 and Q1, CD8<sup>+</sup> T<sub>N</sub> cells percentage in 20 min after CD19 CAR T infusion were ranked and divided the into four quartiles, with the lowest CD8<sup>+</sup> T<sub>N</sub> cells frequency in quartile one (Q1) and the greatest in quartile four (Q4)
